# Supplementary material
Source: MDPI journal article supplement (https://www.mdpi.com/1424-2818/14/7/548)
Supplement: s1 [file s1]

**Table S1.** Characterization of 30 cattle microsatellite markers tested in Indian Mithuns and wild gaur.

| Sl. No. | Markers  | Chromosome location | Primer sequences (5' - 3')                             | Annealing Temperature(°C) | Dye |
|---------|----------|---------------------|--------------------------------------------------------|---------------------------|-----|
| 1       | ETH225   | 9                   | GATCACCTTGCCACTATTTTCCT<br>ACATGACAGCCAGCTGCTACT       | 58                        | FAM |
| 2       | ETH152   | 5                   | TACTCGTAGGGCAGGCTGCCTG<br>GAGACCTCAGGGTTGGTGATCAG      | 50                        | FAM |
| 3       | HEL1     | 15                  | CAACAGCTATTTAACAAGGA<br>AGGCTACAGTCCATGGGATT           | 52                        | FAM |
| 4       | ILSTS005 | 10                  | GGAAGCAATGAAATCTATAGCC<br>TGTTCTGTGAGTTTGTAAGC         | -                         | -   |
| 5       | HEL5     | 21                  | GCAGGATCACTTGTTAGGGA<br>AGACGTTAGTGACATTAAC            | -                         | -   |
| 6       | INRA005  | 12                  | CAATCTGCATGAAGTATAAATAT<br>CTTCAGGCATACCCCTACACC       | -                         | -   |
| 7       | INRA035  | 16                  | ATCCTTTGCAGCCTCCACATTG<br>TTGTGCTTTATGACACTATCCG       | -                         | -   |
| 8       | INRA063  | 18                  | ATTTGCACAAGCTAAATCTAACC<br>AAACCACAGAAATGCTTGGAAG      | -                         | -   |
| 9       | MM8      | 2                   | CCCAAGGACAGAAAAGACT<br>CTCAAGATAAGACCACACC             | -                         | -   |
| 10      | MM12     | 9                   | CAAGACAGGTGTTTCAATCT<br>ATCGACTCTGGGGATGATGT           | 55                        | FAM |
| 11      | HEL9     | 8                   | CCCATTCACTCTTCAGAGGT<br>CACATCCATGTTCTCACCAC           | -                         | -   |
| 12      | CSRM60   | 10                  | AAGATGTGATCCAAGAGAGAGGCA<br>AGGACCAGATCGTGAAAGGCATAG   | -                         | -   |
| 13      | CSSM66   | 14                  | ACACAAATCCTTTCTGCCAGCTGA<br>AATTTAATGCACTGAGGAGCTTGG   | 55                        | FAM |
| 14      | ETH185   | 17                  | TGCATGGACAGAGCAGCCTGGC<br>GCACCCCAACGAAAGCTCCCAG       | 50                        | PET |
| 15      | HAUT24   | 22                  | CTCTCTGCCTTTGTCCCTGT<br>AATACACTTTAGGAGAAAAATA         | -                         | -   |
| 16      | HAUT27   | 26                  | TTTTATGTTTCATTTTTTGACTGG<br>AACTGCTGAAATCTCCATCTTA     | 50                        | VIC |
| 17      | ETH3     | 19                  | GAACCTGCCTCTCCTGCATTGG<br>ACTCTGCCTGTGGCCAAGTAGG       | 50                        | VIC |
| 18      | ETH 10   | 5                   | GTTCAGGACTGGCCTGCTAACA<br>CCTCCAGCCCACTTTCTCTTCTC      | 50                        | VIC |
| 19      | INRA032  | 11                  | AAACTGTATTCTCTAATAGCAC<br>GCAAGACATATCTCCATTCTTT       | -                         | -   |
| 20      | INRA023  | 3                   | GAGTAGAGCTACAAGATAAACTTC<br>TAACTACAGGGTGTTAGATGAACTCA | -                         | -   |
| 21      | BM2113   | 2                   | GCTGCCTTCTACCAAATACCC                                  | 50                        | VIC |

|    |          |    |                          |    |     |
|----|----------|----|--------------------------|----|-----|
|    |          |    | CTTAGACAACAGGGGTTTGG     |    |     |
| 22 | BM1818   | 23 | AGCTGGGAATATAACCAAAGG    | 55 | FAM |
|    |          |    | AGTGCTTTCAAGGTCCATGC     |    |     |
| 23 | BM1824   |    | GAGCAAGGTGTTTTCCAATC     | 55 | NED |
|    |          |    | CATTCTCCAAGTCTTCCTTG     |    |     |
| 24 | HEL 13   | 11 | TAAG GACTTGAGATAAG GAG   | 50 | NED |
|    |          |    | CCATCTACCTCCATCTTAAC     |    |     |
| 25 | ILSTS006 | 7  | TGTCTGTATTTCTGCTGTGG     | 55 | FAM |
|    |          |    | ACACGGAAGCGATCTAAACG     |    |     |
| 26 | ILSTS030 | 2  | CTGCAGTTCTGCATATGTGG     | 50 | NED |
|    |          |    | CTTAGACAACAGGGGTTTGG     |    |     |
| 27 | ILSTS034 | 5  | AAGGGTCTAAGTCCACTGGC     | 55 | PET |
|    |          |    | GACCTGGTTTAGCAGAGAGC     |    |     |
| 28 | ILSTS033 | 12 | TATTAGAGTGGCTCAGTGCC     | 50 | PET |
|    |          |    | ATGCAGACAGTTTATAGAGGG    |    |     |
| 29 | ILSTS011 | 14 | GCTTGCTACATGGAAAGTGC     | 50 | NED |
|    |          |    | CTAAAATGCAGAGCCCTACC     |    |     |
| 30 | ILSTS054 | 21 | GAG GA TCTTGATTTTGATGTCC | 58 | PET |
|    |          |    | AGGGCCACTATGGTACTTCC     |    |     |

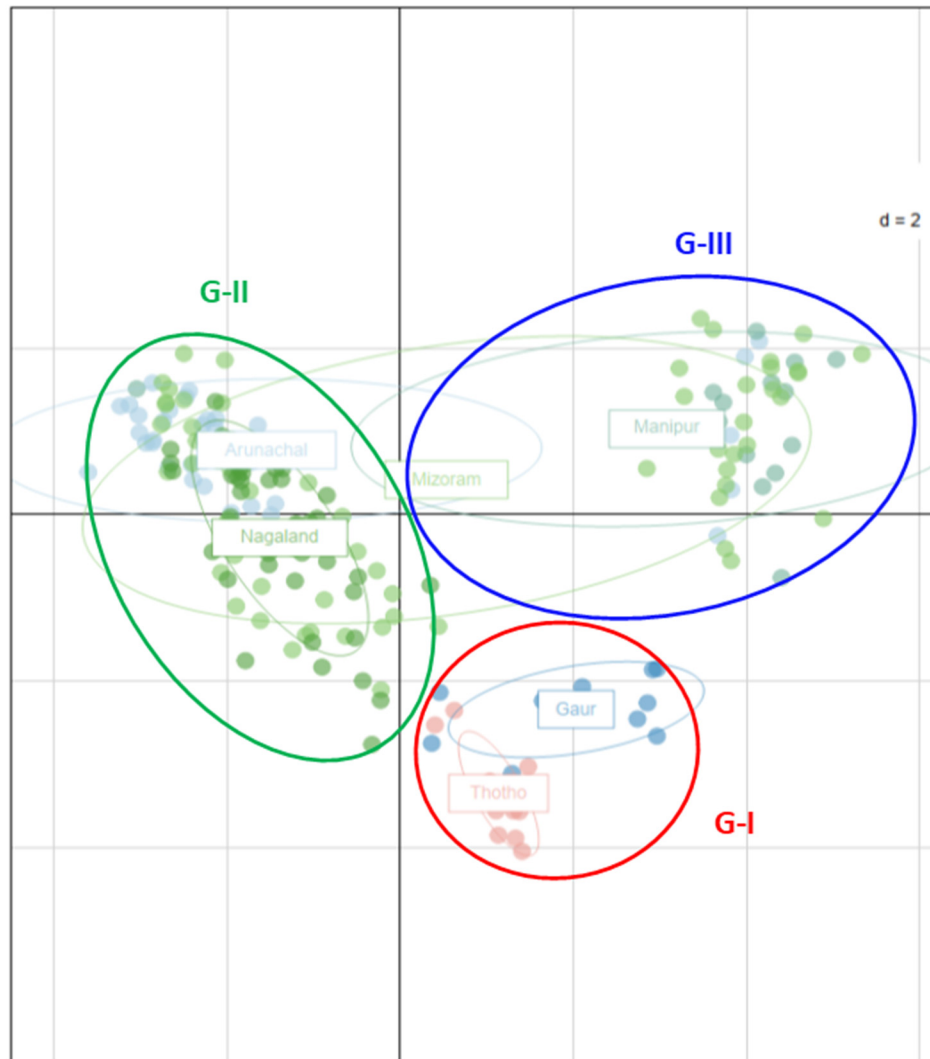

**Figure S1.** PCA analysis clustering the structured sub-populations separately.

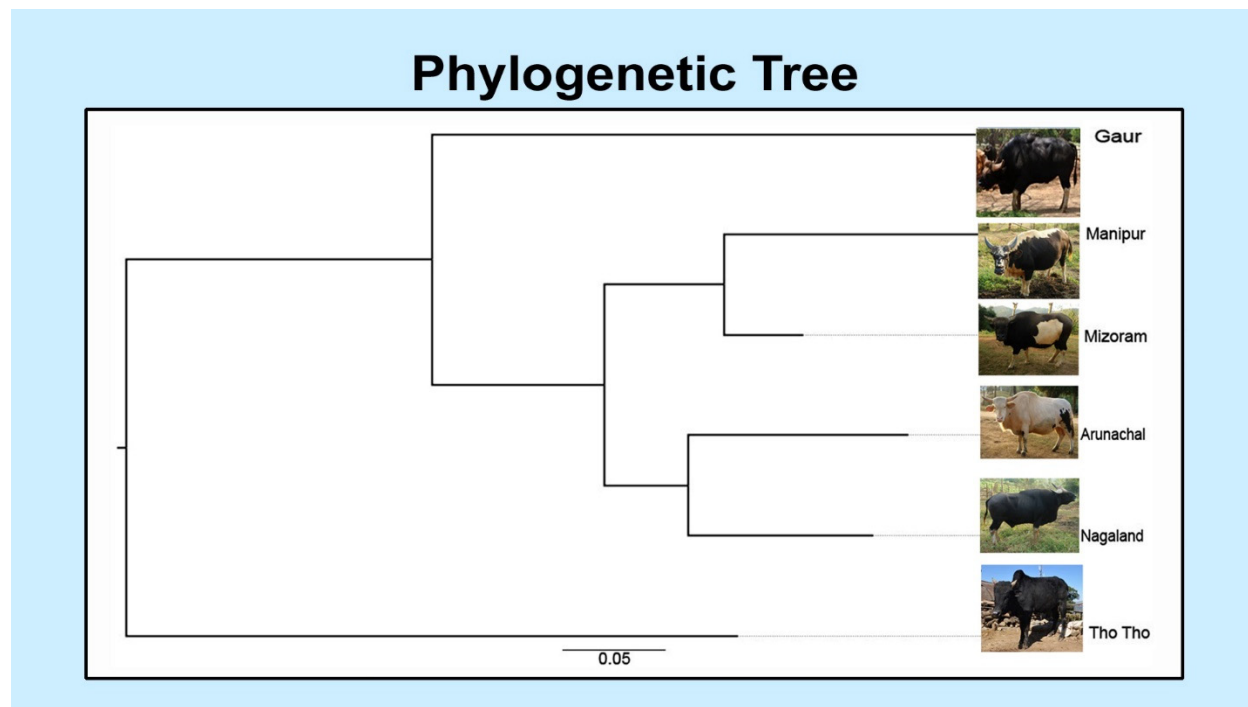

**Figure S2.** Neighbour-joining (NJ) tree showing phylogenetic relation based on the Nei's distances among mithun, wild gaur and Tho-tho cattle from North Eastern Hill Region of India.
